# Supplementary material for: Endoscopy-Assisted Versus Open Tissue Expander Placement in Plastic and Reconstructive Surgery: A Meta-Analysis
Source: Research Square preprint supplement (doi:10.21203/rs.3.rs-365596/v1), 2021-03-31
Supplement: Supplementary file 1 [file 79a62eadb0d366ef3f03b853.docx]

**Search strategies (November 22, 2020):**

Pubmed:

#1: (flap[title] OR flaps[title] OR tissue[title] OR skin[title]) AND (Expanders[title] OR Expander[title] OR expansion[title] OR expANDed[title])

#2: "Tissue Expansion"[Mesh] OR "Expansion, Tissue"[All Fields] OR "Expansions, Tissue"[All Fields] OR "Tissue Expansions"[All Fields]

#3："Tissue Expansion Devices"[Mesh] OR ("Device"[All Fields] AND "Tissue Expansion"[All Fields]) OR ("Devices"[All Fields] AND "Tissue Expansion"[All Fields]) OR "Tissue Expansion Device"[All Fields] OR "Tissue Expanders"[All Fields] OR ("Expander"[All Fields] AND "Tissue"[All Fields]) OR ("Expanders"[All Fields] AND "Tissue"[All Fields]) OR "Tissue Expander"[All Fields] OR ("Tissue Expanders"[All Fields] AND "Vacuum"[All Fields]) OR ("Expander"[All Fields] AND "Vacuum Tissue"[All Fields]) OR ("Expanders"[All Fields] AND "Vacuum Tissue"[All Fields]) OR ("Tissue Expander"[All Fields] AND "Vacuum"[All Fields]) OR "Vacuum Tissue Expander"[All Fields] OR "Vacuum Tissue Expanders"[All Fields]

#4: "endoscope s"[All Fields] OR "endoscoped"[All Fields] OR "endoscopes"[MeSH Terms] OR "endoscopes"[All Fields] OR "endoscope"[All Fields] OR "endoscopical"[All Fields] OR "endoscopically"[All Fields] OR "endoscopy"[MeSH Terms] OR "endoscopy"[All Fields] OR "endoscopic"[All Fields]

(#1 OR #2 OR #3) AND #4

Embase:

#1: (flap:ti OR flaps:ti OR tissue:ti OR skin:ti) AND (expanders:ti OR expander:ti OR expansion:ti OR expanded:ti)

#2: 'tissue expansion':ti,ab,kw OR 'expansion, tissue':ti,ab,kw OR 'expansions, tissue':ti,ab,kw OR 'tissue expansions':ti,ab,kw

#3: 'tissue expansion devices':ti,ab,kw OR ('device':ti,ab,kw AND 'tissue expansion':ti,ab,kw) OR ('devices':ti,ab,kw AND 'tissue expansion':ti,ab,kw) OR 'tissue expansion device':ti,ab,kw OR 'tissue expanders':ti,ab,kw OR ('expander':ti,ab,kw AND 'tissue':ti,ab,kw) OR ('expanders':ti,ab,kw AND 'tissue':ti,ab,kw) OR 'tissue expander':ti,ab,kw OR ('tissue expanders':ti,ab,kw AND 'vacuum':ti,ab,kw) OR ('expander':ti,ab,kw AND 'vacuum tissue':ti,ab,kw) OR ('expanders':ti,ab,kw AND 'vacuum tissue':ti,ab,kw) OR ('tissue expander':ti,ab,kw AND 'vacuum':ti,ab,kw) OR 'vacuum tissue expander':ti,ab,kw OR 'vacuum tissue expanders':ti,ab,kw

#4: 'endoscope s':ti,ab,kw OR 'endoscoped':ti,ab,kw OR 'endoscopes':ti,ab,kw OR 'endoscope':ti,ab,kw OR 'endoscopical':ti,ab,kw OR 'endoscopically':ti,ab,kw OR 'endoscopy':ti,ab,kw OR 'endoscopic':ti,ab,kw

(#1 OR #2 OR #3) AND #4

Web of Science:

#1: TS= “Tissue Expansion Devices” or (TS= Device and TS= “Tissue Expansion”) or (TS= Devices and TS=“Tissue Expansion”)

or TS= “Tissue Expansion Device” or TS= “Tissue Expanders” or (TS= Expander and TS= Tissue) or (TS= Expanders and TS= Tissue) or TS= "Tissue Expander” or (TS= “Tissue Expanders” and TS= Vacuum) or (TS= Expander and TS= "Vacuum Tissue")

or (TS= Expanders and TS= "Vacuum Tissue") or (TS= "Tissue Expander” and TS= Vacuum) or TS="Vacuum Tissue Expander”

or TS= "Vacuum Tissue Expanders"

#2: TI=Tissue Expansion or (TI=Expansion and TI=Tissue) or (TI=Expansions and TI=Tissue) or TI=Tissue Expansions

#3: TS="endoscopes" OR TS="endoscoped" OR TS="endoscopes" OR TS="endoscope" OR TS="endoscopical" OR TS="endoscopically"OR TS="endoscopy" OR TS="endoscopy"OR TS="endoscopic"

(#1 OR #2) AND #3

Cochrane library:

#1: (tissue expansion):ti,ab,kw OR (tissue expander):ti,ab,kw OR (expanded flap):ti,ab,kw

#2: (endoscopy):ti,ab,kw

#1 and #2

China National Knowledge Infrastructure Database (CNKI, 知网):

((SU=皮瓣 OR SU=软组织 OR SU=皮肤) AND (SU=扩张)) OR (SU=组织扩张术 OR SU= 组织扩张器 OR SU=组织扩张囊)

China Science AND Technology Journal Database (CSTJ, 维普):

(((M=皮瓣 OR M=软组织 OR M=皮肤) AND (M=扩张)) OR (M=组织扩张术 OR M=组织扩张器 OR M=组织扩张囊)) and (M=内镜 or M=内窥镜)

Wanfang Data (万方):

(((题名或关键词:("皮瓣") OR 题名或关键词:("软组织") OR 题名或关键词:("皮肤")) AND 题名或关键词:("扩张")) OR 主题:("组织扩张术") OR 主题:("组织扩张器") OR 主题:("组织扩张囊")) and (主题:("内镜")+主题:("内窥镜"))

SinoMed (中国生物医学文献服务系统):

((("皮瓣"[常用字段:智能] OR "软组织"[常用字段:智能] OR "皮肤"[常用字段:智能]) AND "扩张"[常用字段:智能]) OR "组织扩张术"[常用字段:智能] OR "组织扩张器"[常用字段:智能] OR "组织扩张囊"[常用字段:智能]) AND ("内镜"[常用字段:智能] OR "内窥镜"[常用字段:智能])
